# Supplementary material for: STRAP as a New Therapeutic Target for Poor Prognosis of Pancreatic Ductal Adenocarcinoma Patients Mainly Caused by TP53 Mutation
Source: PubMed Central journal article supplement (PMC7550692; doi:10.3389/fonc.2020.594224), 2020-09-29
Supplement: Data_Sheet_1.pdf [file Data_Sheet_1.pdf]

## Supplementary Material

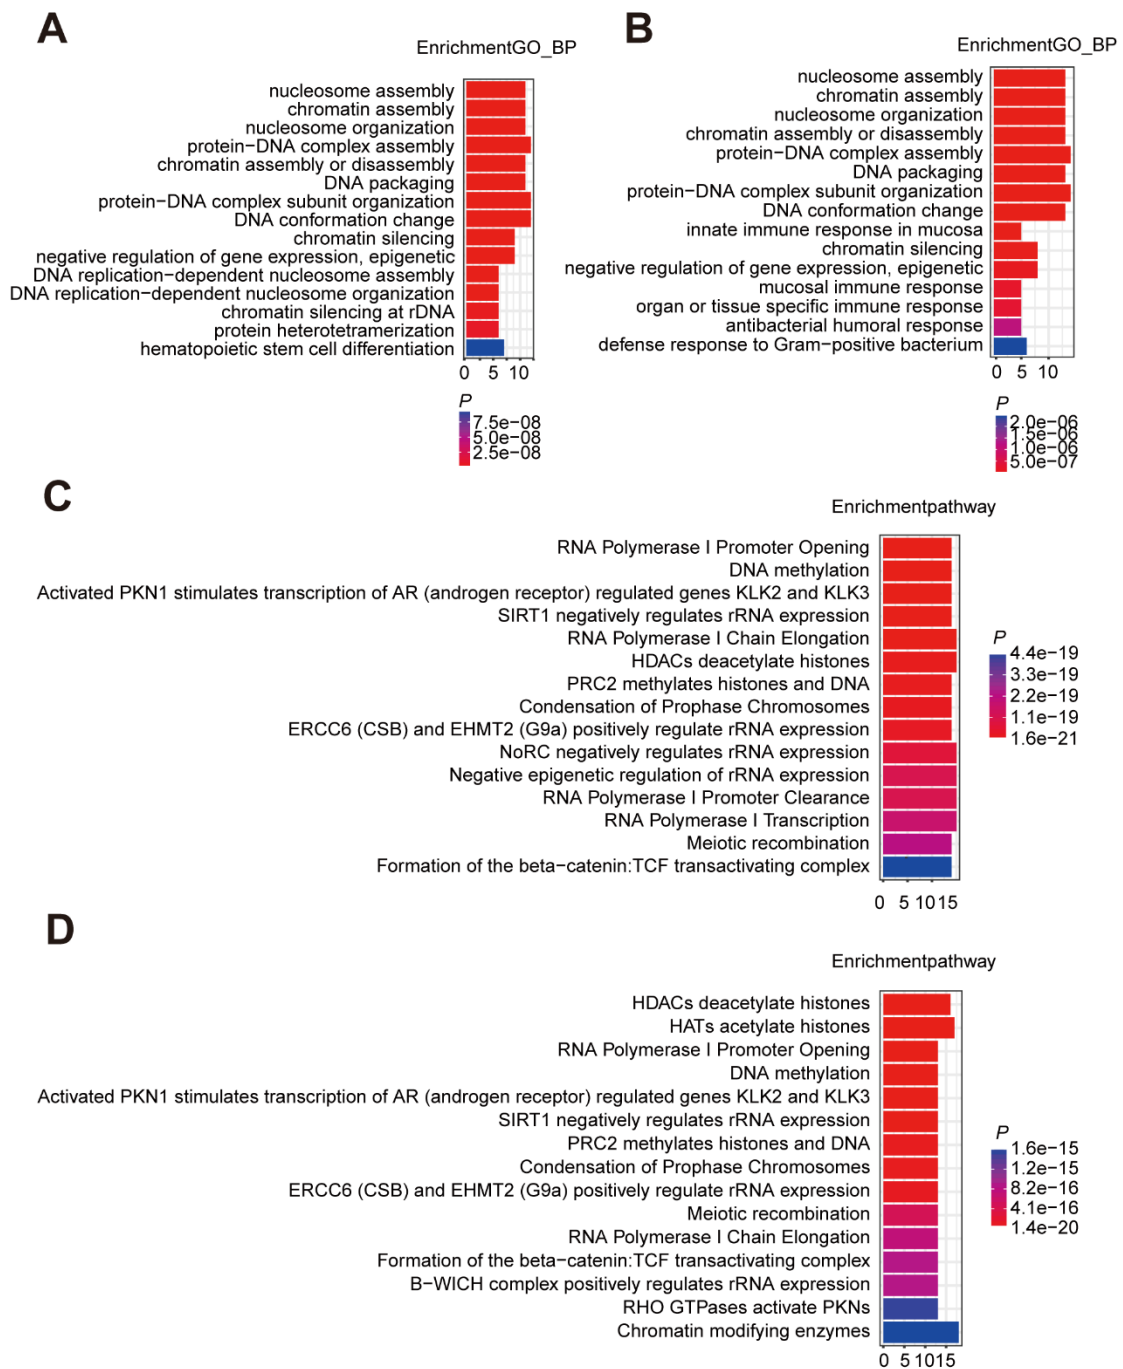

**Supplementary Figure 1. Functional enrichment analysis of the differentially expressed genes (DEGs).** (A) Biological process analysis of DEGs by Student's t-test. (B) Biological process analysis of DEGs by RankCompV2. (C) ReactomePA analysis of DEGs by Student's t-test. (D) ReactomePA analysis of DEGs by RankCompV2.

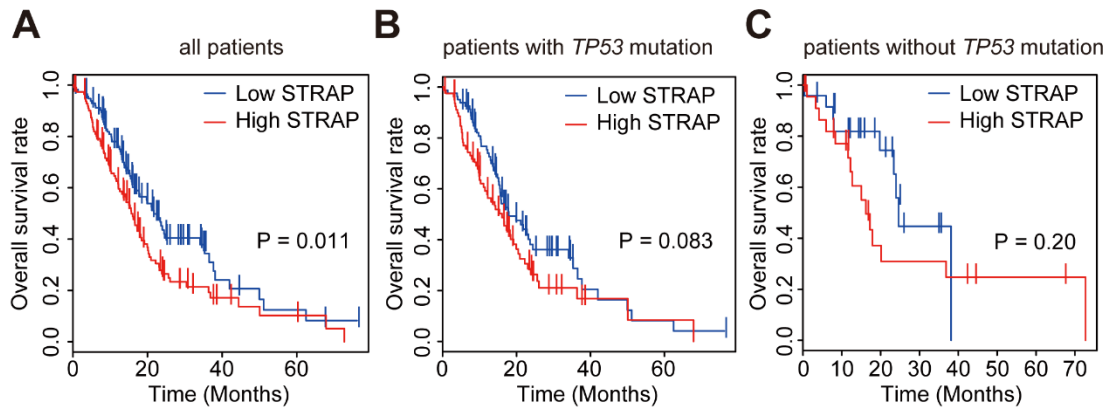

**Supplementary Figure 2. Expression levels of STRAP were inversely correlated with the prognosis of PDAC patients.** Kaplan–Meier survival curves for PDAC patients according to the STRAP expression in tumor tissues based on (A) all patients, (B) patients with *TP53* mutation and (C) patients without *TP53* mutation. Significance was calculated using the log-rank test.

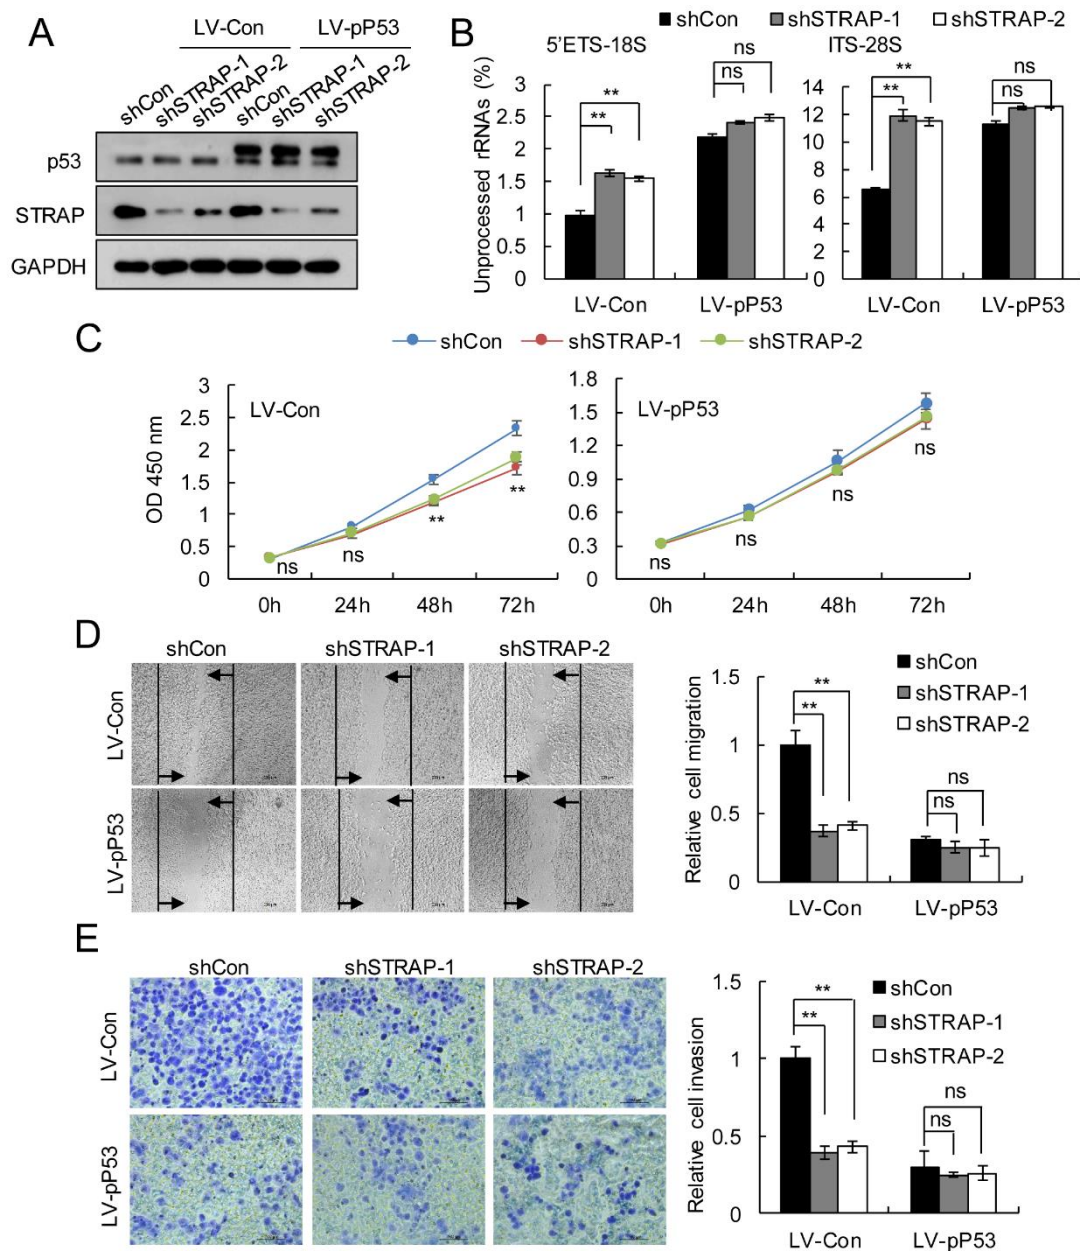

**Supplementary Figure 3. STRAP knockdown suppressed progression of *TP53*-mutant PANC-1 cells by inhibiting snoRNA-mediated rRNA maturation.** PANC-1 cells with p53 overexpression or control vector were infected with control or STRAP-knockdown lentiviruses. (A) p53 and STRAP expression were analyzed by western blotting. (B) rRNA processing by detecting 5'ETS-18S and ITS-28S using quantitative reverse transcriptase PCR assays. The data are shown as the mean  $\pm$  SEM of 3 independent experiments. (C) The cell proliferation assay was performed at the indicated time points. (D) Representative micrographs of cell migration assays at 48h (left) and quantification results (right). (E) Representative micrographs of cell invasion assays (left) and quantification results (right). Data in C-E are shown as the mean  $\pm$  SEM of 3 independent experiments.  $**P < 0.01$ .

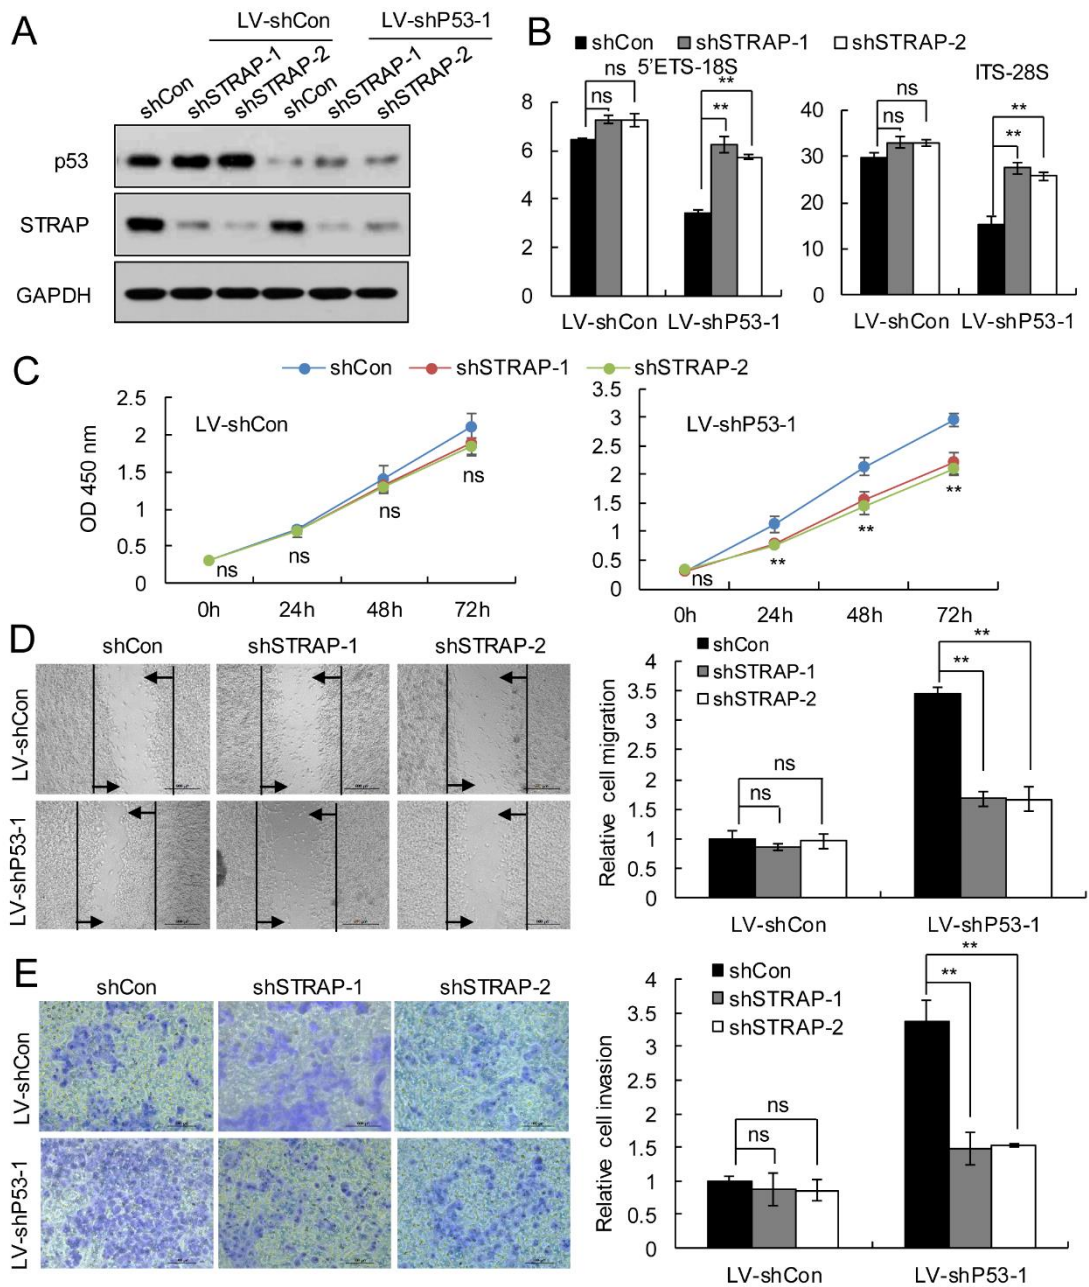

**Supplementary Figure 4. STRAP knockdown suppressed progression of p53-knockdown PANC-0327 cells by inhibiting snoRNA-mediated rRNA maturation.** PANC-0327 cells with p53 knockdown or control vector were infected with control or STRAP-knockdown lentiviruses. (A) p53 and STRAP expression were analyzed by western blotting. (B) rRNA processing by detecting 5'ETS-18S and ITS-28S using quantitative reverse transcriptase PCR assays. The data are shown as the mean  $\pm$  SEM of 3 independent experiments. (C) The cell proliferation assay was performed at the indicated time points. (D) Representative micrographs of cell migration assays at 48h (left) and quantification results (right). (E) Representative micrographs of cell invasion assays (left) and quantification results (right). Data in C-E are shown as the mean  $\pm$  SEM of 3 independent experiments. **\*\*** $P < 0.01$ .

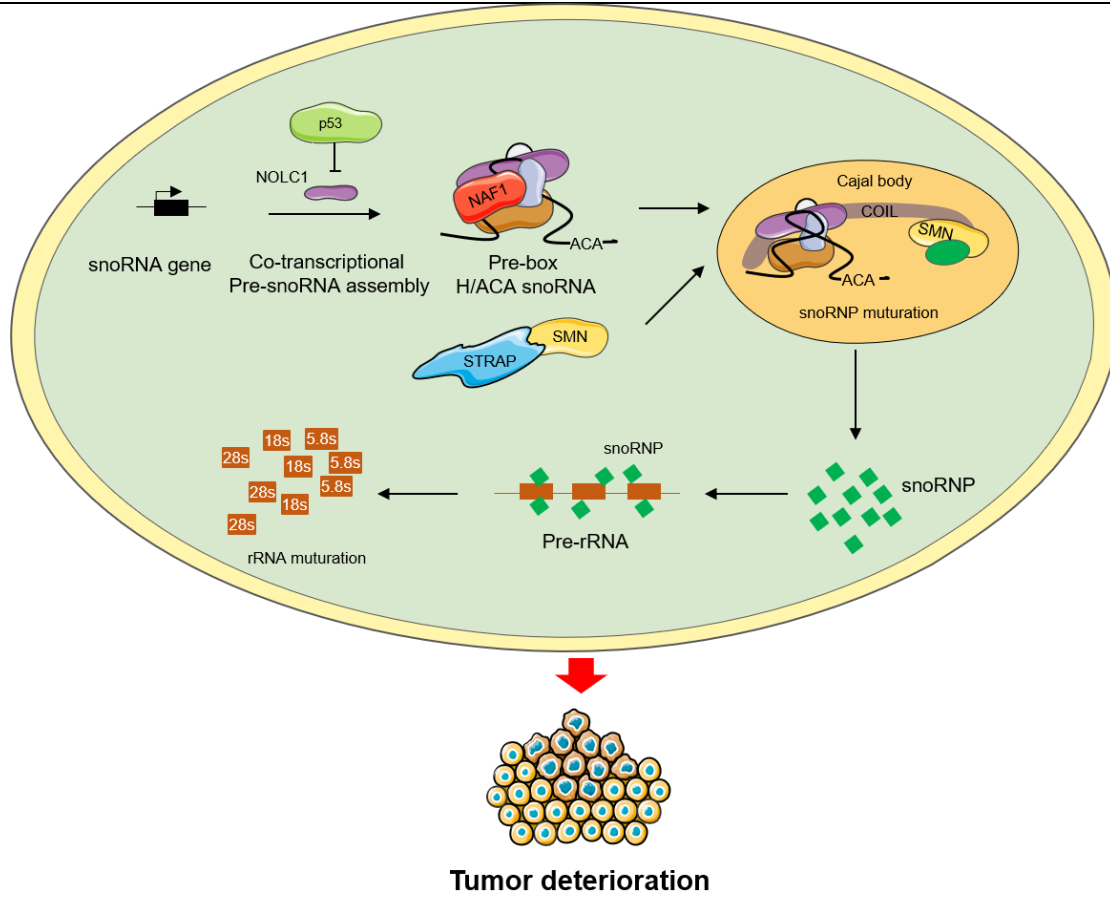

Supplementary Figure 5. Mechanism model of TP53 affecting PDAC progression.

## Supplementary Tables

**Supplementary Table 1. Sequences of primers for qPCR.**

| Primers <sup>a</sup> | Sequences (5' → 3')          | Usage (Target loci/genes <sup>b</sup> )                               |
|----------------------|------------------------------|-----------------------------------------------------------------------|
| H-GAPDH-F            | ATGACATCAAGAAGGTGGTG         | GAPDH                                                                 |
| H-GAPDH-R            | CATACCAGGAAATGAGCTTG         |                                                                       |
| 18S-1                | GCGGGACACTCAGCTAAGAGC        | Quantification for both processed and unprocessed 18S rRNA            |
| 18S-2                | GGCCCTGTAATTGGAATGAG         |                                                                       |
| 18S-3                | GCGCCCGTCGGCATGTATTAGCTC     | Quantification for unprocessed 18S rRNA using an sense primer         |
| 18S-4                | CTCGCCGCGCTCTACCTTACCTACCTGG |                                                                       |
| 18S-5                | GGCAGGATCAACCAGGTAGGTAAGG    | Quantification for unprocessed 18S rRNA using an anti-sense primer    |
| 18S-6                | GGGGGGCGGGTGGTTGGGGCGTCC     |                                                                       |
| 28S-a                | CTTACGGTACTTGTGACTATCGGTCTCG | Quantification for both processed and unprocessed 28S rRNA            |
| 28S-b                | CCAAGTCCTTCTGATCGAGGCC       |                                                                       |
| 28S-c                | CGCTGGGCTCTTCCCTGTTCACCTCG   | Quantification for unprocessed 28S rRNA using a specific sense primer |
| 28S-d                | CCCGTCCCCCTCCGAGACGCGACC     |                                                                       |
| 28S-e                | CGTCTGATCTGAGGTCGCGTCTCGG    | Quantification for unprocessed 28S rRNA using an anti-sense primer    |
| 28S-f                | CTCTCTCCCGTCGCCTCTCCCC       |                                                                       |

<sup>a</sup>F, forward strand; R, reverse strand.

---

**Supplementary Table 2. Information of donors in the data sets.**

---

| <b>Data sets</b>  | <b>Country</b> | <b>Donors</b> | <b>SSM</b> | <b>Effective donor</b> | <b>RNA-seq</b> |
|-------------------|----------------|---------------|------------|------------------------|----------------|
| PACA-AU           | Australia      | 461           | 391        | 386                    | 91             |
| PACA-CA           | Canada         | 308           | 260        | 247                    | 46             |
| PAAD-AU<br>(TCGA) | United States  | 154           | 133        | 133                    | 142            |
| Total             | -              | 923           | 784        | 762                    | 279            |

---

SSM: Simple Somatic Mutation

**Supplementary Table 3. Multivariate analysis of factors affecting patients' overall survival in PDAC (n = 762).**

| <b>Factors</b> | <b>Patients</b> | <b>Median Survival<br/>(Months)</b> | <b><i>P</i></b> |
|----------------|-----------------|-------------------------------------|-----------------|
| Platform       | 762             | 19.9                                | 0.58            |
| TCGA           | 133             | 19.9                                |                 |
| PACA-AU        | 386             | 18.7                                |                 |
| PACA-CA        | 243             | 20.9                                |                 |
| Gender         | 762             | 19.9                                | 0.23            |
| Male           | 417             | 19.2                                |                 |
| Female         | 345             | 20.3                                |                 |
| Age            | 758             | 19.9                                | 0.076           |
| >65 year       | 407             | 18.4                                |                 |
| ≤65 year       | 351             | 21.6                                |                 |
| Mutation       |                 |                                     | 0.0028          |
| 0              | 38              | 29.8                                |                 |
| 1              | 153             | 24.6                                |                 |
| 2              | 343             | 19.9                                |                 |
| 3              | 198             | 17.2                                |                 |
| 4              | 30              | 15.2                                |                 |



**Supplementary Table 4. Mutation frequency of four driver genes in patients with PDAC in this study.**

| <b>Mutation</b> | <b>Total patients</b> | <b>KRAS(%)</b> | <b>TP53(%)</b> | <b>SMAD4(%)</b> | <b>CDKN2A(%)</b> |
|-----------------|-----------------------|----------------|----------------|-----------------|------------------|
| /               | 784                   | 709(90.43)     | 542(69.13)     | 182(23.21)      | 162(20.66)       |
| 1 gene          | 159(20.28)            | 131(82.39)     | 22(13.84)      | 4(2.52)         | 2(1.26)          |
| 2 genes         | 353(45.03)            | 347(98.30)     | 293(83.00)     | 46(13.03)       | 20(5.67)         |
| 3 genes         | 202(25.77)            | 200(99.01)     | 196(97.03)     | 101(50.00)      | 109(53.96)       |
| ≥1 genes        | 745(95.03)            | 709(95.17)     | 542(72.75)     | 182(24.43)      | 162(21.74)       |
| ≥2 genes        | 586(74.74)            | 578(98.63)     | 520(88.74)     | 178(30.38)      | 160(27.30)       |
| ≥3 genes        | 233(29.72)            | 231(99.14)     | 227(97.42)     | 132(56.65)      | 140(60.09)       |

**Supplementary Table 5. Mutation background in the four driver genes of pancreatic cancer cell lines in CCLE.**

| Cell Type | Hugo Symbol | Entrez Gene Id | Ncbi Build | Chr | Start Position | End Position | Reference Allele | Tumor Seq Allele | Protein Change |
|-----------|-------------|----------------|------------|-----|----------------|--------------|------------------|------------------|----------------|
| PANC-1    | KRAS        | 3845           | 37         | 12  | 25398284       | 25398284     | C                | T                | p.G12D         |
|           | TP53        | 7157           | 37         | 17  | 7577120        | 7577120      | C                | T                | p.R273H        |
| Patu-8988 | KRAS        | 3845           | 37         | 12  | 25398284       | 25398284     | C                | A                | p.G12V         |
|           | TP53        | 7157           | 37         | 17  | 7577094        | 7577094      | G                | A                | p.R282W        |
| KP4       | KRAS        | 3845           | 37         | 12  | 25398284       | 25398284     | C                | T                | p.G12D         |
| PANC-0327 | KRAS        | 3845           | 37         | 12  | 25398284       | 25398284     | C                | A                | p.G12V         |

**Supplementary Table 6. Differentially expressed genes in patients with *TP53* mutation compared to non-mutated patients.**

| Gene symbol                 | Enterz id | <i>P</i> | OR    | Description                                                | Category       | Gene symbol | Enterz id | Direction | Description                                           | Category       |
|-----------------------------|-----------|----------|-------|------------------------------------------------------------|----------------|-------------|-----------|-----------|-------------------------------------------------------|----------------|
| Student's two-tailed t-test |           |          |       |                                                            |                | RankCompV2  |           |           |                                                       |                |
| ADAM6                       | 8755      | 2.13E-02 | -2.41 | ADAM Metallopeptidase Domain 6 (Pseudogene)                | Pseudogene     | ADH1C       | 126       | down      | Alcohol Dehydrogenase 1C (Class I), Gamma Polypeptide | Protein Coding |
| ADAMTSL3                    | 57188     | 7.19E-03 | 2.41  | ADAMTS Like 3                                              | Protein Coding | ADRA2A      | 150       | down      | Adrenoceptor Alpha 2A                                 | Protein Coding |
| ADH1B                       | 125       | 2.88E-02 | -2.20 | Alcohol Dehydrogenase 1B (Class I), Beta Polypeptide       | Protein Coding | AQP1        | 358       | down      | Aquaporin 1 (Colton Blood Group)                      | Protein Coding |
| AGAP11                      | 119385    | 1.37E-02 | 2.70  | ArfGAP With GTPase Domain, Ankyrin Repeat And PH Domain 11 | Protein Coding | C7orf71     | 285941    | down      | Chromosome 7 Open Reading Frame 71                    | Protein Coding |

|              |        |          |      |                                                                       |                |                |        |      |                                                    |                   |
|--------------|--------|----------|------|-----------------------------------------------------------------------|----------------|----------------|--------|------|----------------------------------------------------|-------------------|
| ANKRD3<br>6B | 57730  | 1.40E-03 | 2.43 | Ankyrin<br>Repeat<br>Domain 36B                                       | Protein Coding | CAMTA2         | 23125  | down | Calmodulin Binding<br>Transcription<br>Activator 2 | Protein<br>Coding |
| ASTN2        | 23245  | 3.69E-02 | 3.07 | Astrotactin 2                                                         | Protein Coding | CHKB-CPT1<br>B | 386593 | down | CHKB-CPT1B Readth<br>rough (NMD<br>Candidate)      | RNA Gene          |
| ATP9B        | 374868 | 2.60E-03 | 2.87 | ATPase<br>Phospholipid<br>Transporting<br>9B (Putative)<br>Chromosome | Protein Coding | CLDN2          | 9075   | down | Claudin 2                                          | Protein<br>Coding |
| C12orf50     | 160419 | 1.04E-02 | 4.06 | 12 Open<br>Reading<br>Frame 50<br>Chromosome                          | Protein Coding | CLDN5          | 7122   | down | Claudin 5                                          | Protein<br>Coding |
| C16orf74     | 404550 | 3.00E-02 | 2.04 | 16 Open<br>Reading<br>Frame 74<br>Chromosome                          | Protein Coding | CRISP3         | 10321  | down | Cysteine Rich<br>Secretory Protein 3               | Protein<br>Coding |
| C4orf36      | 132989 | 8.61E-04 | 2.63 | 4 Open<br>Reading<br>Frame 36                                         | Protein Coding | CTRB2          | 440387 | down | Chymotrypsinogen<br>B2                             | Protein<br>Coding |

|         |        |          |       |                                             |                |       |        |      |                                          |                   |
|---------|--------|----------|-------|---------------------------------------------|----------------|-------|--------|------|------------------------------------------|-------------------|
| C7      | 730    | 2.11E-02 | -2.14 | Complement<br>C7                            | Protein Coding | DCAF8 | 50717  | down | DDB1 And CUL4<br>Associated Factor 8     | Protein<br>Coding |
| CBWD5   | 220869 | 7.38E-04 | 2.23  | COBW<br>Domain<br>Containing 5              | Protein Coding | FGFR4 | 2264   | down | Fibroblast Growth<br>Factor Receptor 4   | Protein<br>Coding |
| CD3E    | 916    | 4.68E-02 | -2.04 | CD3e<br>Molecule                            | Protein Coding | HPYR1 | 93668  | down | Helicobacter Pylori<br>Responsive 1      | RNA Gene          |
| CGB5    | 93659  | 4.87E-02 | 3.16  | Chorionic<br>Gonadotropin<br>Subunit Beta 5 | Protein Coding | HYAL1 | 3373   | down | Hyaluronoglucosami<br>nidase 1           | Protein<br>Coding |
| CHRDL1  | 91851  | 1.59E-02 | -2.42 | Chordin Like 1                              | Protein Coding | KDM6B | 23135  | down | Lysine Demethylase<br>6B                 | Protein<br>Coding |
| CLDN2   | 9075   | 1.10E-03 | -2.28 | Claudin 2                                   | Protein Coding | LIPI  | 149998 | down | Lipase I                                 | Protein<br>Coding |
| COX6B2  | 125965 | 7.00E-05 | 2.07  | Cytochrome C<br>Oxidase<br>Subunit 6B2      | Protein Coding | LYG2  | 254773 | down | Lysozyme G2                              | Protein<br>Coding |
| CYSLTR1 | 10800  | 2.68E-03 | 3.77  | Cysteinyl<br>Leukotriene<br>Receptor 1      | Protein Coding | MUC6  | 4588   | down | Mucin 6, Oligomeric<br>Mucus/Gel-Forming | Protein<br>Coding |

|       |        |          |       |                                                   |                |        |        |      |                                                   |                |
|-------|--------|----------|-------|---------------------------------------------------|----------------|--------|--------|------|---------------------------------------------------|----------------|
| DARC  | 2532   | 9.70E-03 | -2.03 | Atypical Chemokine Receptor 1 (Duffy Blood Group) | Protein Coding | NPC1L1 | 29881  | down | NPC1 Like Intracellular Cholesterol Transporter 1 | Protein Coding |
| DNAH2 | 146754 | 4.88E-03 | -2.35 | Dynein Axonemal Heavy Chain 2                     | Protein Coding | NPHS2  | 7827   | down | NPHS2, Podocin                                    | Protein Coding |
| DPT   | 1805   | 1.11E-02 | -2.02 | Dermatopontin                                     | Protein Coding | OR2A25 | 392138 | down | Olfactory Receptor Family 2 Subfamily A Member 25 | Protein Coding |
| FABP5 | 2171   | 7.50E-03 | 2.50  | Fatty Acid Binding Protein 5                      | Protein Coding | OR5K2  | 402135 | down | Olfactory Receptor Family 5 Subfamily K Member 2  | Protein Coding |
| FST   | 10468  | 4.70E-02 | 2.30  | Follistatin                                       | Protein Coding | SMOC2  | 64094  | down | SPARC Related Modular Calcium Binding 2           | Protein Coding |

|               |        |          |      |                                                      |                |        |        |      |                                                      |                   |
|---------------|--------|----------|------|------------------------------------------------------|----------------|--------|--------|------|------------------------------------------------------|-------------------|
| GTF2H2        | 2966   | 1.24E-04 | 2.02 | General<br>Transcription<br>Factor IIIH<br>Subunit 2 | Protein Coding | SNORA8 | 654320 | down | Small Nucleolar<br>RNA, H/ACA Box 8                  | RNA Gene          |
| GUSBP3        | 653188 | 2.06E-03 | 2.54 | Glucuronidase<br>, Beta<br>Pseudogene 3              | Pseudogene     | SOX1   | 6656   | down | SRY-Box 1                                            | Protein<br>Coding |
| HES4          | 57801  | 5.59E-03 | 2.12 | Hes Family<br>BHLH<br>Transcription<br>Factor 4      | Protein Coding | TCL1B  | 9623   | down | T Cell<br>Leukemia/Lymphom<br>a 1B                   | Protein<br>Coding |
| HIST1H2<br>AD | 3013   | 4.53E-03 | 2.23 | Histone<br>Cluster 1 H2A<br>Family<br>Member D       | Protein Coding | TMBIM4 | 51643  | down | Transmembrane BAX<br>Inhibitor Motif<br>Containing 4 | Protein<br>Coding |
| HIST1H2<br>AE | 3012   | 4.16E-03 | 3.12 | Histone<br>Cluster 1 H2A<br>Family<br>Member E       | Protein Coding | TNXB   | 7148   | down | Tenascin XB                                          | Protein<br>Coding |

|               |      |          |      |                                                |                |        |       |      |                                                                           |                   |
|---------------|------|----------|------|------------------------------------------------|----------------|--------|-------|------|---------------------------------------------------------------------------|-------------------|
| HIST1H2<br>AJ | 8331 | 2.06E-02 | 2.24 | Histone<br>Cluster 1 H2A<br>Family<br>Member J | Protein Coding | TRPC7  | 57113 | down | Transient Receptor<br>Potential Cation<br>Channel Subfamily C<br>Member 7 | Protein<br>Coding |
| HIST1H2<br>AK | 8330 | 2.57E-02 | 2.07 | Histone<br>Cluster 1 H2A<br>Family<br>Member K | Protein Coding | TYR    | 7299  | down | Tyrosinase                                                                | Protein<br>Coding |
| HIST1H2<br>BF | 8343 | 1.76E-02 | 2.70 | Histone<br>Cluster 1 H2B<br>Family<br>Member F | Protein Coding | ADK    | 132   | up   | Adenosine Kinase                                                          | Protein<br>Coding |
| HIST1H2<br>BG | 8339 | 5.17E-04 | 3.34 | Histone<br>Cluster 1 H2B<br>Family<br>Member G | Protein Coding | ARNTL2 | 56938 | up   | Aryl Hydrocarbon<br>Receptor Nuclear<br>Translocator Like 2               | Protein<br>Coding |
| HIST1H2<br>BH | 8345 | 5.26E-03 | 4.67 | Histone<br>Cluster 1 H2B<br>Family<br>Member H | Protein Coding | ATP5I  | 521   | up   | ATP Synthase<br>Membrane Subunit E                                        | Protein<br>Coding |



|               |      |          |      |                                                |                |          |        |    |                                                   |                   |
|---------------|------|----------|------|------------------------------------------------|----------------|----------|--------|----|---------------------------------------------------|-------------------|
| HIST1H2<br>BI | 8346 | 1.45E-02 | 3.19 | Histone<br>Cluster 1 H2B<br>Family<br>Member I | Protein Coding | BCYRN1   | 618    | up | Brain Cytoplasmic<br>RNA 1                        | RNA Gene          |
| HIST1H2<br>BM | 8342 | 1.71E-02 | 2.93 | Histone<br>Cluster 1 H2B<br>Family<br>Member M | Protein Coding | C12orf50 | 160419 | up | Chromosome 12<br>Open Reading Frame<br>50         | Protein<br>Coding |
| HIST1H3<br>D  | 8351 | 2.75E-02 | 2.05 | Histone<br>Cluster 1 H3<br>Family<br>Member D  | Protein Coding | C15orf48 | 84419  | up | Chromosome 15<br>Open Reading Frame<br>48         | Protein<br>Coding |
| HIST1H3<br>F  | 8968 | 5.66E-03 | 5.55 | Histone<br>Cluster 1 H3<br>Family<br>Member F  | Protein Coding | C8orf59  | 401466 | up | Chromosome 8 Open<br>Reading Frame 59             | Protein<br>Coding |
| HIST1H3<br>J  | 8356 | 2.60E-02 | 2.15 | Histone<br>Cluster 1 H3<br>Family<br>Member J  | Protein Coding | CARD18   | 59082  | up | Caspase Recruitment<br>Domain Family<br>Member 18 | Protein<br>Coding |

|              |        |          |       |                                                       |                |                   |        |    |                                                            |                   |
|--------------|--------|----------|-------|-------------------------------------------------------|----------------|-------------------|--------|----|------------------------------------------------------------|-------------------|
| HIST1H4<br>E | 8367   | 1.41E-02 | 2.27  | Histone<br>Cluster 1 H4<br>Family<br>Member E         | Protein Coding | CBWD6             | 644019 | up | COBW Domain<br>Containing 6                                | Protein<br>Coding |
| HIST1H4<br>J | 8363   | 2.57E-02 | 2.13  | Histone<br>Cluster 1 H4<br>Family<br>Member J         | Protein Coding | CDHR4             | 389118 | up | Cadherin Related<br>Family Member 4                        | Protein<br>Coding |
| HIST1H4<br>K | 8362   | 9.20E-04 | 3.40  | Histone<br>Cluster 1 H4<br>Family<br>Member K         | Protein Coding | DNAJC25-G<br>NG10 | 552891 | up | DNAJC25-GNG10 Re<br>adthrough                              | Protein<br>Coding |
| HRASLS<br>2  | 54979  | 2.61E-02 | 2.79  | HRAS Like<br>Suppressor 2                             | Protein Coding | EIF3C             | 8663   | up | Eukaryotic<br>Translation Initiation<br>Factor 3 Subunit C | Protein<br>Coding |
| HSPB6        | 126393 | 4.50E-02 | -2.46 | Heat Shock<br>Protein Family<br>B (Small)<br>Member 6 | Protein Coding | ENY2              | 56943  | up | ENY2, Transcription<br>And Export Complex<br>2 Subunit     | Protein<br>Coding |

|              |       |          |       |                                     |                |           |        |    |                                                   |                   |
|--------------|-------|----------|-------|-------------------------------------|----------------|-----------|--------|----|---------------------------------------------------|-------------------|
| IGF1         | 3479  | 3.82E-02 | -2.06 | Insulin Like<br>Growth Factor<br>1  | Protein Coding | FABP6     | 2172   | up | Fatty Acid Binding<br>Protein 6 Protein<br>Coding | Protein<br>Coding |
| KIAA132<br>8 | 57536 | 1.18E-03 | 3.88  | KIAA1328                            | Protein Coding | FAM9B     | 171483 | up | Family With<br>Sequence Similarity 9<br>Member B  | Protein<br>Coding |
| KRT13        | 3860  | 4.61E-02 | 2.86  | Keratin 13                          | Protein Coding | GNGT1     | 2792   | up | G Protein Subunit<br>Gamma Transducin 1           | Protein<br>Coding |
| KRT6A        | 3853  | 4.56E-03 | 3.14  | Keratin 6A                          | Protein Coding | HIST1H1C  | 3006   | up | Histone Cluster 1 H1<br>Family Member C           | Protein<br>Coding |
| LYPD3        | 27076 | 2.46E-03 | 2.06  | LY6/PLAUR<br>Domain<br>Containing 3 | Protein Coding | HIST1H2AB | 8335   | up | Histone Cluster 1<br>H2A Family Member<br>B       | Protein<br>Coding |

|        |        |          |       |                                                                               |                |           |      |    |                                             |                   |
|--------|--------|----------|-------|-------------------------------------------------------------------------------|----------------|-----------|------|----|---------------------------------------------|-------------------|
| MALAT1 | 378938 | 1.29E-04 | 2.75  | Metastasis<br>Associated<br>Lung<br>Adenocarcino<br>ma Transcript<br>1        | RNA Gene       | HIST1H2AC | 8334 | up | Histone Cluster 1<br>H2A Family Member<br>C | Protein<br>Coding |
| MIPOL1 | 145282 | 9.88E-03 | 2.53  | Mirror-Image<br>Polydactyly 1                                                 | Protein Coding | HIST1H2AM | 8336 | up | Histone Cluster 1<br>H2A Family Member<br>M | Protein<br>Coding |
| MMRN1  | 22915  | 1.08E-02 | -2.02 | Multimerin 1                                                                  | Protein Coding | HIST1H2BB | 3018 | up | Histone Cluster 1<br>H2B Family Member<br>B | Protein<br>Coding |
| NAV3   | 89795  | 1.16E-02 | 2.38  | Neuron<br>Navigator 3                                                         | Protein Coding | HIST1H2BC | 8347 | up | Histone Cluster 1<br>H2B Family Member<br>C | Protein<br>Coding |
| NEDD4  | 4734   | 8.46E-04 | 3.74  | Neural<br>Precursor Cell<br>Expressed,<br>Developmenta<br>lly<br>Down-Regulat | Protein Coding | HIST1H2BI | 8346 | up | Histone Cluster 1<br>H2B Family Member<br>I | Protein<br>Coding |

|        |        |          |       |                                                                      |                |           |      |    |                                             |                   |
|--------|--------|----------|-------|----------------------------------------------------------------------|----------------|-----------|------|----|---------------------------------------------|-------------------|
|        |        |          |       | ed 4, E3<br>Ubiquitin<br>Protein Ligase                              |                |           |      |    |                                             |                   |
| P2RY8  | 286530 | 4.01E-02 | -2.01 | P2Y Receptor<br>Family<br>Member 8                                   | Protein Coding | HIST1H2BJ | 8970 | up | Histone Cluster 1<br>H2B Family Member<br>J | Protein<br>Coding |
| PARP15 | 165631 | 9.90E-03 | 2.45  | Poly(ADP-Rib<br>ose)<br>Polymerase<br>Family<br>Member 15            | Protein Coding | HIST1H2BM | 8342 | up | Histone Cluster 1<br>H2B Family Member<br>M | Protein<br>Coding |
| PI3    | 5266   | 5.20E-03 | 2.16  | Peptidase<br>Inhibitor 3                                             | Protein Coding | HIST1H2BO | 8348 | up | Histone Cluster 1<br>H2B Family Member<br>C | Protein<br>Coding |
| PIGL   | 9487   | 8.00E-04 | 2.49  | Phosphatidyli<br>nositol Glycan<br>Anchor<br>Biosynthesis<br>Class L | Protein Coding | HIST1H3B  | 8358 | up | Histone Cluster 1 H3<br>Family Member B     | Protein<br>Coding |

|          |        |          |       |                                              |                |           |        |    |                                       |                |
|----------|--------|----------|-------|----------------------------------------------|----------------|-----------|--------|----|---------------------------------------|----------------|
| PLIN4    | 729359 | 2.66E-02 | -3.21 | Perilipin 4                                  | Protein Coding | HIST1H3H  | 8357   | up | Histone Cluster 1 H3 Family Member H  | Protein Coding |
| POP4     | 10775  | 1.88E-02 | 2.11  | POP4 Homolog, Ribonuclease P/MRP Subunit     | Protein Coding | HIST1H4H  | 8365   | up | Histone Cluster 1 H4 Family Member H  | Protein Coding |
| PPP1R16B | 26051  | 2.81E-02 | -2.12 | Protein Phosphatase 1 Regulatory Subunit 16B | Protein Coding | HIST2H2AB | 317772 | up | Histone Cluster 2 H2A Family Member B | Protein Coding |
| PSCA     | 8000   | 9.63E-04 | 2.19  | Prostate Stem Cell Antigen                   | Protein Coding | HIST2H2BE | 8349   | up | Histone Cluster 2 H2B Family Member E | Protein Coding |
| PVT1     | 5820   | 2.05E-05 | 2.34  | Pvt1 Oncogene                                | RNA Gene       | HIST2H2BF | 440689 | up | Histone Cluster 2 H2B Family Member F | Protein Coding |

|             |        |          |      |                                                            |                |          |       |    |                                                           |                   |
|-------------|--------|----------|------|------------------------------------------------------------|----------------|----------|-------|----|-----------------------------------------------------------|-------------------|
| RIC3        | 79608  | 1.37E-02 | 2.51 | RIC3<br>Acetylcholine<br>Receptor<br>Chaperone<br>Reactive | Protein Coding | HIST2H4A | 8370  | up | Histone Cluster 2 H4<br>Family Member A                   | Protein<br>Coding |
| ROMO1       | 140823 | 2.33E-02 | 2.23 | Oxygen<br>Species<br>Modulator 1                           | Protein Coding | HTN3     | 3347  | up | Histatin 3                                                | Protein<br>Coding |
| RPS28       | 6234   | 9.49E-03 | 2.49 | Ribosomal<br>Protein S28                                   | Protein Coding | IFI44    | 10561 | up | Interferon Induced<br>Protein 44                          | Protein<br>Coding |
| SCARNA<br>5 | 677775 | 6.77E-03 | 2.08 | Small Cajal<br>Body-Specific<br>RNA 5                      | RNA Gene       | IGF2BP3  | 10643 | up | Insulin Like Growth<br>Factor 2 mRNA<br>Binding Protein 3 | Protein<br>Coding |
| SCARNA<br>9 | 619383 | 2.49E-03 | 2.16 | Small Cajal<br>Body-Specific<br>RNA 9                      | RNA Gene       | KRTAP4-1 | 85285 | up | Keratin Associated<br>Protein 4-1                         | Protein<br>Coding |

|             |        |          |       |                                              |                |         |        |    |                                                                 |                   |
|-------------|--------|----------|-------|----------------------------------------------|----------------|---------|--------|----|-----------------------------------------------------------------|-------------------|
| SFRP1       | 6422   | 2.98E-02 | -2.04 | Secreted<br>Frizzled<br>Related<br>Protein 1 | Protein Coding | MBOAT2  | 129642 | up | Membrane Bound<br>O-Acyltransferase<br>Domain Containing 2      | Protein<br>Coding |
| SHISA9      | 729993 | 3.84E-03 | 3.37  | Shisa Family<br>Member 9                     | Protein Coding | MRGPRX3 | 117195 | up | MAS Related GPR<br>Family Member X3                             | Protein<br>Coding |
| SNCG        | 6623   | 1.54E-02 | 2.72  | Synuclein<br>Gamma                           | Protein Coding | NKX2-1  | 7080   | up | NK2 Homeobox 1                                                  | Protein<br>Coding |
| SNORA1<br>2 | 677800 | 1.87E-04 | 3.48  | Small<br>Nucleolar<br>RNA, H/ACA<br>Box 12   | RNA Gene       | NSMCE2  | 286053 | up | NSE2 (MMS21)<br>Homolog,<br>SMC5-SMC6<br>Complex SUMO<br>Ligase | Protein<br>Coding |



|              |               |          |      |                                             |          |        |        |    |                                                        |                   |
|--------------|---------------|----------|------|---------------------------------------------|----------|--------|--------|----|--------------------------------------------------------|-------------------|
| SNORA3<br>7  | 677819        | 1.89E-02 | 3.59 | Small<br>Nucleolar<br>RNA, H/ACA<br>Box 37  | RNA Gene | OR1J4  | 26219  | up | Olfactory Receptor<br>Family 1 Subfamily J<br>Member 4 | Protein<br>Coding |
| SNORA3<br>8B | 1001245<br>36 | 8.04E-03 | 2.84 | Small<br>Nucleolar<br>RNA, H/ACA<br>Box 38B | RNA Gene | PDCD5  | 9141   | up | Programmed Cell<br>Death 5                             | Protein<br>Coding |
| SNORA4<br>7  | 677828        | 4.00E-03 | 4.27 | Small<br>Nucleolar<br>RNA, H/ACA<br>Box 47  | RNA Gene | PIWIL3 | 440822 | up | Piwi Like<br>RNA-Mediated Gene<br>Silencing 3          | Protein<br>Coding |
| SNORA4<br>9  | 677829        | 4.19E-02 | 2.77 | Small<br>Nucleolar<br>RNA, H/ACA<br>Box 49  | RNA Gene | PSCA   | 8000   | up | Prostate Stem Cell<br>Antigen                          | Protein<br>Coding |
| SNORA5<br>A  | 654319        | 4.26E-02 | 5.71 | Small<br>Nucleolar<br>RNA, H/ACA<br>Box 5A  | RNA Gene | PSMC1  | 5700   | up | Proteasome 26S<br>Subunit, ATPase 1                    | Protein<br>Coding |
| SNORA7<br>4A | 26821         | 7.36E-03 | 2.34 | Small<br>Nucleolar<br>RNA, H/ACA<br>Box 74A | RNA Gene | RANBP1 | 5902   | up | RAN Binding Protein<br>1                               | Protein<br>Coding |

|              |        |          |      |                                                     |                |          |        |    |                                                |                   |
|--------------|--------|----------|------|-----------------------------------------------------|----------------|----------|--------|----|------------------------------------------------|-------------------|
| SNORA7<br>4B | 677841 | 1.17E-03 | 2.81 | Small<br>Nucleolar<br>RNA, H/ACA<br>Box 74B         | RNA Gene       | RARRES3  | 5920   | up | Retinoic Acid<br>Receptor Responder<br>3       | Protein<br>Coding |
| SNORA7<br>9  | 677845 | 7.07E-03 | 3.13 | Small<br>Nucleolar<br>RNA, H/ACA<br>Box 79          | RNA Gene       | RGPD8    | 727851 | up | RANBP2-Like And<br>GRIP Domain<br>Containing 8 | Protein<br>Coding |
| SNORA8<br>0  | 677846 | 4.41E-02 | 2.59 | Small<br>Nucleolar<br>RNA, H/ACA<br>Box 80D         | RNA Gene       | RPL39    | 6170   | up | Ribosomal Protein<br>L39                       | Protein<br>Coding |
| SNORD1<br>5B | 114599 | 2.35E-02 | 4.55 | Small<br>Nucleolar<br>RNA, C/D Box<br>15B           | RNA Gene       | RPS28    | 6234   | up | Ribosomal Protein<br>S28                       | Protein<br>Coding |
| SNORD1<br>7  | 692086 | 2.37E-03 | 2.21 | Small<br>Nucleolar<br>RNA, C/D Box<br>17            | RNA Gene       | SCARNA1  | 677774 | up | Small Cajal<br>Body-Specific RNA 1             | RNA Gene          |
| SPC25        | 57405  | 2.50E-04 | 2.06 | SPC25, NDC80<br>Kinetochore<br>Complex<br>Component | Protein Coding | SCARNA23 | 677773 | up | Small Cajal<br>Body-Specific RNA<br>23         | RNA Gene          |

|             |        |          |       |                                    |                |          |               |    |                                          |                   |
|-------------|--------|----------|-------|------------------------------------|----------------|----------|---------------|----|------------------------------------------|-------------------|
| TBC1D8B     | 54885  | 4.05E-03 | 2.43  | TBC1 Domain<br>Family<br>Member 8B | Protein Coding | SCARNA5  | 677775        | up | Small Cajal<br>Body-Specific RNA 5       | RNA Gene          |
| TMEM16<br>0 | 54958  | 7.12E-03 | 2.03  | Transmembra<br>ne Protein 160      | Protein Coding | SCEL     | 8796          | up | Sciellin                                 | Protein<br>Coding |
| TMEM18<br>2 | 130827 | 3.81E-03 | 3.09  | Transmembra<br>ne Protein 182      | Protein Coding | SNORA38B | 100124<br>536 | up | Small Nucleolar<br>RNA, H/ACA Box<br>38B | RNA Gene          |
| TMEM21<br>2 | 389177 | 1.07E-02 | 4.38  | Transmembra<br>ne Protein 212      | Protein Coding | SNORA71D | 677840        | up | Small Nucleolar<br>RNA, H/ACA Box<br>71D | RNA Gene          |
| TMEM45<br>A | 55076  | 5.92E-03 | 2.52  | Transmembra<br>ne Protein 45A      | Protein Coding | SNORA79  | 677845        | up | Small Nucleolar<br>RNA, H/ACA Box 79     | RNA Gene          |
| TNXB        | 7148   | 2.72E-03 | -2.04 | Tenascin XB                        | Protein Coding | SPERT    | 220082        | up | Spermatid Associated                     | Protein<br>Coding |
| WNT11       | 7481   | 7.24E-03 | 2.05  | Wnt Family<br>Member 11            | Protein Coding | SPINK9   | 643394        | up | Spermatid Associated                     | Protein<br>Coding |

**Supplementary Table 7. Functional enrichment analysis of differentially expressed genes identified by Student's t-test.**

| Category | ID         | Description                                                 | <i>P</i> | <i>p.adjust</i> | <i>qvalue</i> | Count |
|----------|------------|-------------------------------------------------------------|----------|-----------------|---------------|-------|
| BP       | GO:0006334 | nucleosome assembly                                         | 1.63E-12 | 2.11E-09        | 1.88E-09      | 11    |
| BP       | GO:0031497 | chromatin assembly                                          | 6.25E-12 | 4.04E-09        | 3.60E-09      | 11    |
| BP       | GO:0034728 | nucleosome organization                                     | 1.19E-11 | 5.12E-09        | 4.56E-09      | 11    |
| BP       | GO:0065004 | protein-DNA complex assembly                                | 2.05E-11 | 6.61E-09        | 5.90E-09      | 12    |
| BP       | GO:0006333 | chromatin assembly or disassembly                           | 2.90E-11 | 7.50E-09        | 6.69E-09      | 11    |
| BP       | GO:0006323 | DNA packaging                                               | 7.70E-11 | 1.54E-08        | 1.37E-08      | 11    |
| BP       | GO:0071824 | protein-DNA complex subunit organization                    | 8.31E-11 | 1.54E-08        | 1.37E-08      | 12    |
| BP       | GO:0071103 | DNA conformation change                                     | 1.67E-10 | 2.60E-08        | 2.32E-08      | 12    |
| BP       | GO:0006342 | chromatin silencing                                         | 1.81E-10 | 2.60E-08        | 2.32E-08      | 9     |
| BP       | GO:0045814 | negative regulation of gene expression, epigenetic          | 5.68E-10 | 7.34E-08        | 6.54E-08      | 9     |
| BP       | GO:0006335 | DNA replication-dependent nucleosome assembly               | 8.97E-10 | 9.66E-08        | 8.61E-08      | 6     |
| BP       | GO:0034723 | DNA replication-dependent nucleosome organization           | 8.97E-10 | 9.66E-08        | 8.61E-08      | 6     |
| BP       | GO:0000183 | chromatin silencing at rDNA                                 | 2.69E-09 | 2.68E-07        | 2.39E-07      | 6     |
| BP       | GO:0051290 | protein heterotetramerization                               | 6.77E-09 | 6.26E-07        | 5.58E-07      | 6     |
| BP       | GO:0060218 | hematopoietic stem cell differentiation                     | 9.31E-08 | 8.02E-06        | 7.15E-06      | 7     |
| BP       | GO:0045652 | regulation of megakaryocyte differentiation                 | 1.93E-07 | 1.48E-05        | 1.32E-05      | 6     |
| BP       | GO:0002244 | hematopoietic progenitor cell differentiation               | 1.95E-07 | 1.48E-05        | 1.32E-05      | 8     |
| BP       | GO:0045815 | positive regulation of gene expression, epigenetic          | 2.63E-07 | 1.89E-05        | 1.68E-05      | 6     |
| BP       | GO:0030219 | megakaryocyte differentiation                               | 6.45E-07 | 4.39E-05        | 3.91E-05      | 6     |
| BP       | GO:1902036 | regulation of hematopoietic stem cell differentiation       | 1.18E-06 | 7.62E-05        | 6.80E-05      | 6     |
| BP       | GO:0060964 | regulation of gene silencing by miRNA                       | 1.40E-06 | 8.60E-05        | 7.66E-05      | 6     |
| BP       | GO:0060147 | regulation of posttranscriptional gene silencing            | 1.64E-06 | 9.24E-05        | 8.24E-05      | 6     |
| BP       | GO:0060966 | regulation of gene silencing by RNA                         | 1.64E-06 | 9.24E-05        | 8.24E-05      | 6     |
| BP       | GO:1901532 | regulation of hematopoietic progenitor cell differentiation | 2.03E-06 | 1.09E-04        | 9.75E-05      | 6     |

|    |            |                                                                         |          |          |          |   |
|----|------------|-------------------------------------------------------------------------|----------|----------|----------|---|
| BP | GO:0051291 | protein heterooligomerization                                           | 3.03E-06 | 1.57E-04 | 1.40E-04 | 6 |
| BP | GO:0060968 | regulation of gene silencing                                            | 4.80E-06 | 2.39E-04 | 2.13E-04 | 6 |
| BP | GO:2000736 | regulation of stem cell differentiation                                 | 7.33E-06 | 3.51E-04 | 3.13E-04 | 6 |
| BP | GO:0051262 | protein tetramerization                                                 | 8.95E-06 | 4.13E-04 | 3.69E-04 | 6 |
| BP | GO:0016458 | gene silencing                                                          | 1.14E-05 | 5.08E-04 | 4.53E-04 | 9 |
| BP | GO:0045637 | regulation of myeloid cell differentiation                              | 1.53E-05 | 6.58E-04 | 5.87E-04 | 7 |
| BP | GO:0032200 | telomere organization                                                   | 1.99E-05 | 8.31E-04 | 7.40E-04 | 6 |
| BP | GO:0048863 | stem cell differentiation                                               | 2.49E-05 | 1.00E-03 | 8.95E-04 | 7 |
| BP | GO:0019730 | antimicrobial humoral response                                          | 2.60E-05 | 1.02E-03 | 9.07E-04 | 5 |
| BP | GO:0045653 | negative regulation of megakaryocyte differentiation                    | 2.78E-05 | 1.06E-03 | 9.41E-04 | 3 |
| BP | GO:0040029 | regulation of gene expression, epigenetic                               | 2.96E-05 | 1.09E-03 | 9.75E-04 | 9 |
| BP | GO:0061844 | antimicrobial humoral immune response mediated by antimicrobial peptide | 3.12E-05 | 1.12E-03 | 9.98E-04 | 4 |
| BP | GO:0002227 | innate immune response in mucosa                                        | 5.19E-05 | 1.81E-03 | 1.62E-03 | 3 |
| BP | GO:0002385 | mucosal immune response                                                 | 1.63E-04 | 5.56E-03 | 4.95E-03 | 3 |
| BP | GO:0002251 | organ or tissue specific immune response                                | 1.96E-04 | 6.50E-03 | 5.79E-03 | 3 |
| BP | GO:0045638 | negative regulation of myeloid cell differentiation                     | 2.11E-04 | 6.83E-03 | 6.09E-03 | 4 |
| BP | GO:0050830 | defense response to Gram-positive bacterium                             | 2.40E-04 | 7.58E-03 | 6.76E-03 | 4 |
| BP | GO:0038111 | interleukin-7-mediated signaling pathway                                | 2.96E-04 | 9.11E-03 | 8.12E-03 | 3 |
| BP | GO:0030099 | myeloid cell differentiation                                            | 3.05E-04 | 9.16E-03 | 8.16E-03 | 7 |
| BP | GO:0098760 | response to interleukin-7                                               | 3.19E-04 | 9.17E-03 | 8.17E-03 | 3 |
| BP | GO:0098761 | cellular response to interleukin-7                                      | 3.19E-04 | 9.17E-03 | 8.17E-03 | 3 |
| BP | GO:0034080 | CENP-A containing nucleosome assembly                                   | 3.69E-04 | 1.02E-02 | 9.05E-03 | 3 |
| BP | GO:0061641 | CENP-A containing chromatin organization                                | 3.69E-04 | 1.02E-02 | 9.05E-03 | 3 |
| BP | GO:0019731 | antibacterial humoral response                                          | 4.24E-04 | 1.12E-02 | 9.97E-03 | 3 |
| BP | GO:1904837 | beta-catenin-TCF complex assembly                                       | 4.24E-04 | 1.12E-02 | 9.97E-03 | 3 |

|    |            |                                                          |          |          |          |    |
|----|------------|----------------------------------------------------------|----------|----------|----------|----|
| BP | GO:0031055 | chromatin remodeling at centromere                       | 4.83E-04 | 1.25E-02 | 1.11E-02 | 3  |
| BP | GO:0035195 | gene silencing by miRNA                                  | 5.14E-04 | 1.30E-02 | 1.16E-02 | 6  |
| BP | GO:0035194 | posttranscriptional gene silencing by RNA                | 5.69E-04 | 1.41E-02 | 1.26E-02 | 6  |
| BP | GO:0016441 | posttranscriptional gene silencing                       | 5.79E-04 | 1.41E-02 | 1.26E-02 | 6  |
| BP | GO:0006959 | humoral immune response                                  | 6.84E-04 | 1.64E-02 | 1.46E-02 | 6  |
| BP | GO:1903706 | regulation of hemopoiesis                                | 6.97E-04 | 1.64E-02 | 1.46E-02 | 7  |
| BP | GO:0006336 | DNA replication-independent nucleosome assembly          | 7.34E-04 | 1.69E-02 | 1.51E-02 | 3  |
| BP | GO:0034508 | centromere complex assembly                              | 7.75E-04 | 1.73E-02 | 1.54E-02 | 3  |
| BP | GO:0034724 | DNA replication-independent nucleosome organization      | 7.75E-04 | 1.73E-02 | 1.54E-02 | 3  |
| BP | GO:0016233 | telomere capping                                         | 8.18E-04 | 1.76E-02 | 1.57E-02 | 3  |
| BP | GO:0034394 | protein localization to cell surface                     | 8.18E-04 | 1.76E-02 | 1.57E-02 | 3  |
| BP | GO:0031047 | gene silencing by RNA                                    | 8.40E-04 | 1.78E-02 | 1.59E-02 | 6  |
| BP | GO:0043486 | histone exchange                                         | 9.08E-04 | 1.89E-02 | 1.69E-02 | 3  |
| BP | GO:0060026 | convergent extension                                     | 1.12E-03 | 2.29E-02 | 2.04E-02 | 2  |
| BP | GO:1903707 | negative regulation of hemopoiesis                       | 1.25E-03 | 2.53E-02 | 2.26E-02 | 4  |
| BP | GO:0006303 | double-strand break repair via nonhomologous end joining | 2.01E-03 | 3.99E-02 | 3.56E-02 | 3  |
| BP | GO:0017148 | negative regulation of translation                       | 2.08E-03 | 4.08E-02 | 3.64E-02 | 6  |
| BP | GO:0043044 | ATP-dependent chromatin remodeling                       | 2.25E-03 | 4.34E-02 | 3.86E-02 | 3  |
| BP | GO:0034249 | negative regulation of cellular amide metabolic process  | 2.48E-03 | 4.71E-02 | 4.20E-02 | 6  |
| BP | GO:0000726 | non-recombinational repair                               | 2.59E-03 | 4.85E-02 | 4.33E-02 | 3  |
| CC | GO:0000786 | nucleosome                                               | 6.99E-19 | 9.36E-17 | 8.31E-17 | 14 |
| CC | GO:0044815 | DNA packaging complex                                    | 1.80E-18 | 1.20E-16 | 1.07E-16 | 14 |
| CC | GO:0032993 | protein-DNA complex                                      | 7.53E-15 | 3.36E-13 | 2.99E-13 | 14 |
| CC | GO:0000788 | nuclear nucleosome                                       | 5.17E-09 | 1.73E-07 | 1.54E-07 | 6  |
| CC | GO:0000790 | nuclear chromatin                                        | 2.77E-06 | 7.42E-05 | 6.59E-05 | 9  |
| CC | GO:0000784 | nuclear chromosome, telomeric region                     | 6.86E-06 | 1.53E-04 | 1.36E-04 | 6  |

|            |               |                                                                                                 |          |          |          |    |
|------------|---------------|-------------------------------------------------------------------------------------------------|----------|----------|----------|----|
| CC         | GO:0000781    | chromosome, telomeric region                                                                    | 2.62E-05 | 5.02E-04 | 4.45E-04 | 6  |
| CC         | GO:0098687    | chromosomal region                                                                              | 2.29E-04 | 3.83E-03 | 3.40E-03 | 7  |
| CC         | GO:0005578    | proteinaceous extracellular matrix                                                              | 1.75E-03 | 2.61E-02 | 2.31E-02 | 6  |
| MF         | GO:0046982    | protein heterodimerization activity                                                             | 1.89E-10 | 2.69E-08 | 2.55E-08 | 15 |
| MF         | GO:0042393    | histone binding                                                                                 | 8.32E-05 | 5.91E-03 | 5.60E-03 | 6  |
| MF         | GO:0031492    | nucleosomal DNA binding                                                                         | 5.80E-04 | 2.48E-02 | 2.35E-02 | 3  |
| MF         | GO:0033130    | acetylcholine receptor binding                                                                  | 6.98E-04 | 2.48E-02 | 2.35E-02 | 2  |
| MF         | GO:0031491    | nucleosome binding                                                                              | 1.70E-03 | 4.82E-02 | 4.57E-02 | 3  |
| ReactomePA | R-HSA-73728   | RNA Polymerase I Promoter Opening                                                               | 1.65E-21 | 2.50E-19 | 1.75E-19 | 14 |
| ReactomePA | R-HSA-5334118 | DNA methylation                                                                                 | 2.67E-21 | 2.50E-19 | 1.75E-19 | 14 |
| ReactomePA | R-HSA-5625886 | Activated PKN1 stimulates transcription of AR (androgen receptor) regulated genes KLK2 and KLK3 | 4.26E-21 | 2.50E-19 | 1.75E-19 | 14 |
| ReactomePA | R-HSA-427359  | SIRT1 negatively regulates rRNA expression                                                      | 5.35E-21 | 2.50E-19 | 1.75E-19 | 14 |
| ReactomePA | R-HSA-73777   | RNA Polymerase I Chain Elongation                                                               | 5.40E-21 | 2.50E-19 | 1.75E-19 | 15 |
| ReactomePA | R-HSA-3214815 | HDACs deacetylate histones                                                                      | 1.09E-20 | 4.18E-19 | 2.93E-19 | 15 |
| ReactomePA | R-HSA-212300  | PRC2 methylates histones and DNA                                                                | 1.58E-20 | 5.23E-19 | 3.67E-19 | 14 |
| ReactomePA | R-HSA-2299718 | Condensation of Prophase Chromosomes                                                            | 1.95E-20 | 5.63E-19 | 3.95E-19 | 14 |
| ReactomePA | R-HSA-427389  | ERCC6 (CSB) and EHMT2 (G9a) positively regulate rRNA expression                                 | 2.92E-20 | 7.50E-19 | 5.26E-19 | 14 |
| ReactomePA | R-HSA-427413  | NoRC negatively regulates rRNA expression                                                       | 7.34E-20 | 1.69E-18 | 1.19E-18 | 15 |
| ReactomePA | R-HSA-5250941 | Negative epigenetic regulation of rRNA expression                                               | 1.14E-19 | 2.19E-18 | 1.54E-18 | 15 |
| ReactomePA | R-HSA-73854   | RNA Polymerase I Promoter Clearance                                                             | 1.14E-19 | 2.19E-18 | 1.54E-18 | 15 |
| ReactomePA | R-HSA-73864   | RNA Polymerase I Transcription                                                                  | 1.75E-19 | 3.11E-18 | 2.18E-18 | 15 |
| ReactomePA | R-HSA-912446  | Meiotic recombination                                                                           | 2.23E-19 | 3.68E-18 | 2.58E-18 | 14 |
| ReactomePA | R-HSA-201722  | Formation of the beta-catenin:TCF transactivating complex                                       | 4.36E-19 | 6.30E-18 | 4.42E-18 | 14 |
| ReactomePA | R-HSA-5250924 | B-WICH complex positively regulates rRNA expression                                             | 4.36E-19 | 6.30E-18 | 4.42E-18 | 14 |

|            |               |                                                                                       |          |          |          |    |
|------------|---------------|---------------------------------------------------------------------------------------|----------|----------|----------|----|
| ReactomePA | R-HSA-5625740 | RHO GTPases activate PKNs                                                             | 8.26E-19 | 1.12E-17 | 7.87E-18 | 14 |
| ReactomePA | R-HSA-8936459 | RUNX1 regulates genes involved in megakaryocyte differentiation and platelet function | 1.12E-18 | 1.44E-17 | 1.01E-17 | 14 |
| ReactomePA | R-HSA-977225  | Amyloid fiber formation                                                               | 1.76E-18 | 2.14E-17 | 1.50E-17 | 14 |
| ReactomePA | R-HSA-5578749 | Transcriptional regulation by small RNAs                                              | 3.61E-18 | 4.17E-17 | 2.92E-17 | 14 |
| ReactomePA | R-HSA-5250913 | Positive epigenetic regulation of rRNA expression                                     | 4.15E-18 | 4.56E-17 | 3.20E-17 | 14 |
| ReactomePA | R-HSA-3214847 | HATs acetylate histones                                                               | 7.05E-18 | 7.16E-17 | 5.02E-17 | 15 |
| ReactomePA | R-HSA-2559582 | Senescence-Associated Secretory Phenotype (SASP)                                      | 7.13E-18 | 7.16E-17 | 5.02E-17 | 14 |
| ReactomePA | R-HSA-212165  | Epigenetic regulation of gene expression                                              | 1.20E-17 | 1.16E-16 | 8.11E-17 | 15 |
| ReactomePA | R-HSA-1500620 | Meiosis                                                                               | 2.24E-17 | 2.07E-16 | 1.45E-16 | 14 |
| ReactomePA | R-HSA-5617472 | Activation of anterior HOX genes in hindbrain development during early embryogenesis  | 3.21E-17 | 2.75E-16 | 1.93E-16 | 14 |
| ReactomePA | R-HSA-5619507 | Activation of HOX genes during differentiation                                        | 3.21E-17 | 2.75E-16 | 1.93E-16 | 14 |
| ReactomePA | R-HSA-2559580 | Oxidative Stress Induced Senescence                                                   | 4.56E-17 | 3.77E-16 | 2.64E-16 | 14 |
| ReactomePA | R-HSA-8939236 | RUNX1 regulates transcription of genes involved in differentiation of HSCs            | 8.04E-17 | 6.40E-16 | 4.49E-16 | 14 |
| ReactomePA | R-HSA-171306  | Packaging Of Telomere Ends                                                            | 9.52E-17 | 7.33E-16 | 5.15E-16 | 11 |
| ReactomePA | R-HSA-211000  | Gene Silencing by RNA                                                                 | 1.24E-16 | 9.26E-16 | 6.50E-16 | 14 |
| ReactomePA | R-HSA-68875   | Mitotic Prophase                                                                      | 2.58E-16 | 1.86E-15 | 1.31E-15 | 14 |
| ReactomePA | R-HSA-1474165 | Reproduction                                                                          | 3.85E-16 | 2.69E-15 | 1.89E-15 | 14 |
| ReactomePA | R-HSA-606279  | Deposition of new CENPA-containing nucleosomes at the centromere                      | 6.18E-15 | 4.08E-14 | 2.86E-14 | 11 |
| ReactomePA | R-HSA-774815  | Nucleosome assembly                                                                   | 6.18E-15 | 4.08E-14 | 2.86E-14 | 11 |
| ReactomePA | R-HSA-201681  | TCF dependent signaling in response to WNT                                            | 1.27E-14 | 8.13E-14 | 5.71E-14 | 15 |
| ReactomePA | R-HSA-1221632 | Meiotic synapsis                                                                      | 1.32E-14 | 8.23E-14 | 5.77E-14 | 11 |
| ReactomePA | R-HSA-2559586 | DNA Damage/Telomere Stress Induced Senescence                                         | 1.52E-14 | 9.26E-14 | 6.50E-14 | 11 |



|            |               |                                                                                                           |          |          |          |    |
|------------|---------------|-----------------------------------------------------------------------------------------------------------|----------|----------|----------|----|
| ReactomePA | R-HSA-157579  | Telomere Maintenance                                                                                      | 2.02E-14 | 1.20E-13 | 8.41E-14 | 11 |
| ReactomePA | R-HSA-2559583 | Cellular Senescence                                                                                       | 2.52E-14 | 1.46E-13 | 1.02E-13 | 14 |
| ReactomePA | R-HSA-195721  | Signaling by WNT                                                                                          | 1.16E-13 | 6.55E-13 | 4.60E-13 | 16 |
| ReactomePA | R-HSA-3247509 | Chromatin modifying enzymes                                                                               | 1.46E-13 | 7.86E-13 | 5.52E-13 | 15 |
| ReactomePA | R-HSA-4839726 | Chromatin organization                                                                                    | 1.46E-13 | 7.86E-13 | 5.52E-13 | 15 |
| ReactomePA | R-HSA-8878171 | Transcriptional regulation by RUNX1                                                                       | 4.23E-13 | 2.22E-12 | 1.56E-12 | 14 |
| ReactomePA | R-HSA-73886   | Chromosome Maintenance                                                                                    | 5.68E-13 | 2.92E-12 | 2.05E-12 | 11 |
| ReactomePA | R-HSA-3214858 | RMTs methylate histone arginines                                                                          | 6.44E-13 | 3.24E-12 | 2.27E-12 | 10 |
| ReactomePA | R-HSA-195258  | RHO GTPase Effectors                                                                                      | 1.22E-12 | 5.98E-12 | 4.20E-12 | 15 |
| ReactomePA | R-HSA-68886   | M Phase                                                                                                   | 2.74E-11 | 1.32E-10 | 9.25E-11 | 15 |
| ReactomePA | R-HSA-194315  | Signaling by Rho GTPases                                                                                  | 1.52E-10 | 7.18E-10 | 5.04E-10 | 15 |
| ReactomePA | R-HSA-5693571 | Nonhomologous End-Joining (NHEJ)                                                                          | 3.33E-10 | 1.54E-09 | 1.08E-09 | 8  |
| ReactomePA | R-HSA-5693565 | Recruitment and ATM-mediated phosphorylation of repair and signaling proteins at DNA double strand breaks | 7.36E-10 | 3.33E-09 | 2.34E-09 | 8  |
| ReactomePA | R-HSA-5693606 | DNA Double Strand Break Response                                                                          | 8.18E-10 | 3.64E-09 | 2.55E-09 | 8  |
| ReactomePA | R-HSA-2262752 | Cellular responses to stress                                                                              | 1.08E-09 | 4.70E-09 | 3.29E-09 | 14 |
| ReactomePA | R-HSA-69473   | G2/M DNA damage checkpoint                                                                                | 4.47E-09 | 1.91E-08 | 1.34E-08 | 8  |
| ReactomePA | R-HSA-5693607 | Processing of DNA double-strand break ends                                                                | 5.74E-09 | 2.41E-08 | 1.69E-08 | 8  |
| ReactomePA | R-HSA-3214842 | HDMs demethylate histones                                                                                 | 5.90E-08 | 2.44E-07 | 1.71E-07 | 6  |
| ReactomePA | R-HSA-5693567 | HDR through Homologous Recombination (HR) or Single Strand Annealing (SSA)                                | 6.05E-08 | 2.45E-07 | 1.72E-07 | 8  |
| ReactomePA | R-HSA-5693538 | Homology Directed Repair                                                                                  | 8.56E-08 | 3.41E-07 | 2.39E-07 | 8  |
| ReactomePA | R-HSA-5689880 | Ub-specific processing proteases                                                                          | 2.45E-07 | 9.60E-07 | 6.74E-07 | 9  |
| ReactomePA | R-HSA-5693532 | DNA Double-Strand Break Repair                                                                            | 3.57E-07 | 1.37E-06 | 9.64E-07 | 8  |
| ReactomePA | R-HSA-69481   | G2/M Checkpoints                                                                                          | 3.91E-07 | 1.48E-06 | 1.04E-06 | 8  |
| ReactomePA | R-HSA-3214841 | PKMTs methylate histone lysines                                                                           | 4.41E-07 | 1.64E-06 | 1.15E-06 | 6  |

---

|            |               |                                                   |          |          |          |   |
|------------|---------------|---------------------------------------------------|----------|----------|----------|---|
| ReactomePA | R-HSA-69620   | Cell Cycle Checkpoints                            | 2.70E-06 | 9.90E-06 | 6.94E-06 | 9 |
| ReactomePA | R-HSA-5688426 | Deubiquitination                                  | 3.02E-06 | 1.09E-05 | 7.64E-06 | 9 |
| ReactomePA | R-HSA-8866654 | E3 ubiquitin ligases ubiquitinate target proteins | 3.62E-06 | 1.29E-05 | 9.03E-06 | 5 |
| ReactomePA | R-HSA-73894   | DNA Repair                                        | 5.01E-06 | 1.75E-05 | 1.23E-05 | 9 |
| ReactomePA | R-HSA-5689901 | Metalloprotease DUBs                              | 1.59E-05 | 5.46E-05 | 3.83E-05 | 4 |
| ReactomePA | R-HSA-8852135 | Protein ubiquitination                            | 1.61E-05 | 5.46E-05 | 3.83E-05 | 5 |
| ReactomePA | R-HSA-5689603 | UCH proteinases                                   | 8.42E-04 | 2.82E-03 | 1.98E-03 | 4 |
| ReactomePA | R-HSA-1266695 | Interleukin-7 signaling                           | 9.16E-04 | 3.02E-03 | 2.12E-03 | 3 |
| ReactomePA | R-HSA-4551638 | SUMOylation of chromatin organization proteins    | 3.08E-03 | 1.00E-02 | 7.03E-03 | 3 |
| ReactomePA | R-HSA-3108232 | SUMO E3 ligases SUMOylate target proteins         | 1.52E-02 | 4.89E-02 | 3.43E-02 | 3 |

---

BP: biological process; CC: cellular component; MF: molecular function

**Supplementary Table 8. Functional enrichment analysis of differentially expressed genes identified by RankCompV2.**

| Category | ID         | Description                                                             | <i>P</i> | p.adjust | qvalue   | Count |
|----------|------------|-------------------------------------------------------------------------|----------|----------|----------|-------|
| BP       | GO:0006334 | nucleosome assembly                                                     | 4.07E-14 | 5.07E-11 | 4.64E-11 | 13    |
| BP       | GO:0031497 | chromatin assembly                                                      | 2.00E-13 | 1.25E-10 | 1.14E-10 | 13    |
| BP       | GO:0034728 | nucleosome organization                                                 | 4.28E-13 | 1.78E-10 | 1.63E-10 | 13    |
| BP       | GO:0006333 | chromatin assembly or disassembly                                       | 1.23E-12 | 3.83E-10 | 3.50E-10 | 13    |
| BP       | GO:0065004 | protein-DNA complex assembly                                            | 1.53E-12 | 3.83E-10 | 3.50E-10 | 14    |
| BP       | GO:0006323 | DNA packaging                                                           | 3.91E-12 | 8.12E-10 | 7.43E-10 | 13    |
| BP       | GO:0071824 | protein-DNA complex subunit organization                                | 7.84E-12 | 1.40E-09 | 1.28E-09 | 14    |
| BP       | GO:0071103 | DNA conformation change                                                 | 2.50E-10 | 3.90E-08 | 3.57E-08 | 13    |
| BP       | GO:0002227 | innate immune response in mucosa                                        | 3.04E-08 | 4.21E-06 | 3.85E-06 | 5     |
| BP       | GO:0006342 | chromatin silencing                                                     | 3.68E-08 | 4.59E-06 | 4.20E-06 | 8     |
| BP       | GO:0045814 | negative regulation of gene expression, epigenetic                      | 9.94E-08 | 1.13E-05 | 1.03E-05 | 8     |
| BP       | GO:0002385 | mucosal immune response                                                 | 2.25E-07 | 2.33E-05 | 2.14E-05 | 5     |
| BP       | GO:0002251 | organ or tissue specific immune response                                | 3.08E-07 | 2.96E-05 | 2.71E-05 | 5     |
| BP       | GO:0019731 | antibacterial humoral response                                          | 1.16E-06 | 1.04E-04 | 9.49E-05 | 5     |
| BP       | GO:0050830 | defense response to Gram-positive bacterium                             | 2.43E-06 | 2.02E-04 | 1.85E-04 | 6     |
| BP       | GO:0061844 | antimicrobial humoral immune response mediated by antimicrobial peptide | 3.28E-06 | 2.56E-04 | 2.34E-04 | 5     |
| BP       | GO:0019730 | antimicrobial humoral response                                          | 5.59E-06 | 4.10E-04 | 3.75E-04 | 6     |
| BP       | GO:0006335 | DNA replication-dependent nucleosome assembly                           | 9.95E-06 | 6.53E-04 | 5.97E-04 | 4     |
| BP       | GO:0034723 | DNA replication-dependent nucleosome organization                       | 9.95E-06 | 6.53E-04 | 5.97E-04 | 4     |
| BP       | GO:0000183 | chromatin silencing at rDNA                                             | 2.00E-05 | 1.25E-03 | 1.14E-03 | 4     |
| BP       | GO:0051290 | protein heterotetramerization                                           | 3.61E-05 | 2.14E-03 | 1.96E-03 | 4     |
| BP       | GO:1902036 | regulation of hematopoietic stem cell differentiation                   | 7.72E-05 | 4.38E-03 | 4.00E-03 | 5     |
| BP       | GO:0016458 | gene silencing                                                          | 8.35E-05 | 4.53E-03 | 4.14E-03 | 9     |

|            |               |                                                             |          |          |          |    |
|------------|---------------|-------------------------------------------------------------|----------|----------|----------|----|
| BP         | GO:0060218    | hematopoietic stem cell differentiation                     | 1.20E-04 | 5.97E-03 | 5.47E-03 | 5  |
| BP         | GO:1901532    | regulation of hematopoietic progenitor cell differentiation | 1.20E-04 | 5.97E-03 | 5.47E-03 | 5  |
| BP         | GO:0042742    | defense response to bacterium                               | 2.32E-04 | 1.11E-02 | 1.02E-02 | 7  |
| BP         | GO:0045652    | regulation of megakaryocyte differentiation                 | 3.08E-04 | 1.42E-02 | 1.30E-02 | 4  |
| BP         | GO:2000736    | regulation of stem cell differentiation                     | 3.36E-04 | 1.50E-02 | 1.37E-02 | 5  |
| BP         | GO:0045815    | positive regulation of gene expression, epigenetic          | 3.75E-04 | 1.61E-02 | 1.48E-02 | 4  |
| BP         | GO:0030219    | megakaryocyte differentiation                               | 6.64E-04 | 2.76E-02 | 2.52E-02 | 4  |
| BP         | GO:0022600    | digestive system process                                    | 6.91E-04 | 2.78E-02 | 2.54E-02 | 4  |
| BP         | GO:0007586    | digestion                                                   | 7.48E-04 | 2.83E-02 | 2.59E-02 | 5  |
| BP         | GO:0032200    | telomere organization                                       | 7.48E-04 | 2.83E-02 | 2.59E-02 | 5  |
| BP         | GO:0040029    | regulation of gene expression, epigenetic                   | 1.03E-03 | 3.77E-02 | 3.45E-02 | 8  |
| BP         | GO:0060964    | regulation of gene silencing by miRNA                       | 1.08E-03 | 3.86E-02 | 3.53E-02 | 4  |
| BP         | GO:0060147    | regulation of posttranscriptional gene silencing            | 1.20E-03 | 4.05E-02 | 3.71E-02 | 4  |
| BP         | GO:0060966    | regulation of gene silencing by RNA                         | 1.20E-03 | 4.05E-02 | 3.71E-02 | 4  |
| BP         | GO:0002244    | hematopoietic progenitor cell differentiation               | 1.24E-03 | 4.06E-02 | 3.71E-02 | 5  |
| CC         | GO:0000786    | nucleosome                                                  | 3.81E-23 | 5.68E-21 | 5.10E-21 | 17 |
| CC         | GO:0044815    | DNA packaging complex                                       | 1.22E-22 | 9.12E-21 | 8.19E-21 | 17 |
| CC         | GO:0032993    | protein-DNA complex                                         | 3.49E-18 | 1.74E-16 | 1.56E-16 | 17 |
| CC         | GO:0000790    | nuclear chromatin                                           | 9.26E-06 | 3.45E-04 | 3.09E-04 | 9  |
| CC         | GO:0000788    | nuclear nucleosome                                          | 2.03E-05 | 6.06E-04 | 5.44E-04 | 4  |
| CC         | GO:0000781    | chromosome, telomeric region                                | 5.93E-05 | 1.47E-03 | 1.32E-03 | 6  |
| CC         | GO:0000784    | nuclear chromosome, telomeric region                        | 1.98E-04 | 4.21E-03 | 3.78E-03 | 5  |
| MF         | GO:0046982    | protein heterodimerization activity                         | 2.45E-12 | 3.97E-10 | 3.71E-10 | 18 |
| ReactomePA | R-HSA-3214815 | HDACs deacetylate histones                                  | 1.37E-20 | 5.17E-18 | 4.14E-18 | 16 |
| ReactomePA | R-HSA-3214847 | HATs acetylate histones                                     | 3.90E-19 | 7.36E-17 | 5.90E-17 | 17 |
| ReactomePA | R-HSA-73728   | RNA Polymerase I Promoter Opening                           | 5.35E-18 | 6.73E-16 | 5.39E-16 | 13 |

|            |               |                                                                                                 |          |          |          |    |
|------------|---------------|-------------------------------------------------------------------------------------------------|----------|----------|----------|----|
| ReactomePA | R-HSA-5334118 | DNA methylation                                                                                 | 8.33E-18 | 7.85E-16 | 6.29E-16 | 13 |
| ReactomePA | R-HSA-5625886 | Activated PKN1 stimulates transcription of AR (androgen receptor) regulated genes KLK2 and KLK3 | 1.28E-17 | 9.63E-16 | 7.72E-16 | 13 |
| ReactomePA | R-HSA-427359  | SIRT1 negatively regulates rRNA expression                                                      | 1.57E-17 | 9.89E-16 | 7.92E-16 | 13 |
| ReactomePA | R-HSA-212300  | PRC2 methylates histones and DNA                                                                | 4.25E-17 | 2.29E-15 | 1.83E-15 | 13 |
| ReactomePA | R-HSA-2299718 | Condensation of Prophase Chromosomes                                                            | 5.13E-17 | 2.42E-15 | 1.94E-15 | 13 |
| ReactomePA | R-HSA-427389  | ERCC6 (CSB) and EHMT2 (G9a) positively regulate rRNA expression                                 | 7.43E-17 | 3.11E-15 | 2.49E-15 | 13 |
| ReactomePA | R-HSA-912446  | Meiotic recombination                                                                           | 4.77E-16 | 1.80E-14 | 1.44E-14 | 13 |
| ReactomePA | R-HSA-73777   | RNA Polymerase I Chain Elongation                                                               | 7.58E-16 | 2.55E-14 | 2.05E-14 | 13 |
| ReactomePA | R-HSA-201722  | Formation of the beta-catenin:TCF transactivating complex                                       | 8.81E-16 | 2.55E-14 | 2.05E-14 | 13 |
| ReactomePA | R-HSA-5250924 | B-WICH complex positively regulates rRNA expression                                             | 8.81E-16 | 2.55E-14 | 2.05E-14 | 13 |
| ReactomePA | R-HSA-5625740 | RHO GTPases activate PKNs                                                                       | 1.58E-15 | 3.87E-14 | 3.10E-14 | 13 |
| ReactomePA | R-HSA-3247509 | Chromatin modifying enzymes                                                                     | 1.64E-15 | 3.87E-14 | 3.10E-14 | 18 |
| ReactomePA | R-HSA-4839726 | Chromatin organization                                                                          | 1.64E-15 | 3.87E-14 | 3.10E-14 | 18 |
| ReactomePA | R-HSA-171306  | Packaging Of Telomere Ends                                                                      | 1.77E-15 | 3.93E-14 | 3.15E-14 | 11 |
| ReactomePA | R-HSA-2559580 | Oxidative Stress Induced Senescence                                                             | 2.05E-15 | 4.15E-14 | 3.33E-14 | 14 |
| ReactomePA | R-HSA-8936459 | RUNX1 regulates genes involved in megakaryocyte differentiation and platelet function           | 2.09E-15 | 4.15E-14 | 3.33E-14 | 13 |
| ReactomePA | R-HSA-977225  | Amyloid fiber formation                                                                         | 3.16E-15 | 5.95E-14 | 4.77E-14 | 13 |
| ReactomePA | R-HSA-8939236 | RUNX1 regulates transcription of genes involved in differentiation of HSCs                      | 3.58E-15 | 6.43E-14 | 5.15E-14 | 14 |
| ReactomePA | R-HSA-5578749 | Transcriptional regulation by small RNAs                                                        | 6.08E-15 | 1.04E-13 | 8.34E-14 | 13 |
| ReactomePA | R-HSA-2559586 | DNA Damage/Telomere Stress Induced Senescence                                                   | 6.83E-15 | 1.04E-13 | 8.34E-14 | 12 |
| ReactomePA | R-HSA-427413  | NoRC negatively regulates rRNA expression                                                       | 6.90E-15 | 1.04E-13 | 8.34E-14 | 13 |
| ReactomePA | R-HSA-5250913 | Positive epigenetic regulation of rRNA expression                                               | 6.90E-15 | 1.04E-13 | 8.34E-14 | 13 |

|            |               |                                                                                                           |          |          |          |    |
|------------|---------------|-----------------------------------------------------------------------------------------------------------|----------|----------|----------|----|
| ReactomePA | R-HSA-5250941 | Negative epigenetic regulation of rRNA expression                                                         | 1.00E-14 | 1.40E-13 | 1.12E-13 | 13 |
| ReactomePA | R-HSA-73854   | RNA Polymerase I Promoter Clearance                                                                       | 1.00E-14 | 1.40E-13 | 1.12E-13 | 13 |
| ReactomePA | R-HSA-2559582 | Senescence-Associated Secretory Phenotype (SASP)                                                          | 1.13E-14 | 1.52E-13 | 1.22E-13 | 13 |
| ReactomePA | R-HSA-73864   | RNA Polymerase I Transcription                                                                            | 1.44E-14 | 1.87E-13 | 1.50E-13 | 13 |
| ReactomePA | R-HSA-1500620 | Meiosis                                                                                                   | 3.22E-14 | 4.05E-13 | 3.24E-13 | 13 |
| ReactomePA | R-HSA-5617472 | Activation of anterior HOX genes in hindbrain development during early embryogenesis                      | 4.48E-14 | 5.28E-13 | 4.23E-13 | 13 |
| ReactomePA | R-HSA-5619507 | Activation of HOX genes during differentiation                                                            | 4.48E-14 | 5.28E-13 | 4.23E-13 | 13 |
| ReactomePA | R-HSA-2559583 | Cellular Senescence                                                                                       | 5.14E-14 | 5.88E-13 | 4.71E-13 | 15 |
| ReactomePA | R-HSA-606279  | Deposition of new CENPA-containing nucleosomes at the centromere                                          | 1.12E-13 | 1.21E-12 | 9.70E-13 | 11 |
| ReactomePA | R-HSA-774815  | Nucleosome assembly                                                                                       | 1.12E-13 | 1.21E-12 | 9.70E-13 | 11 |
| ReactomePA | R-HSA-211000  | Gene Silencing by RNA                                                                                     | 1.54E-13 | 1.61E-12 | 1.29E-12 | 13 |
| ReactomePA | R-HSA-1221632 | Meiotic synapsis                                                                                          | 2.38E-13 | 2.43E-12 | 1.94E-12 | 11 |
| ReactomePA | R-HSA-68875   | Mitotic Prophase                                                                                          | 3.00E-13 | 2.97E-12 | 2.38E-12 | 13 |
| ReactomePA | R-HSA-157579  | Telomere Maintenance                                                                                      | 3.65E-13 | 3.53E-12 | 2.83E-12 | 11 |
| ReactomePA | R-HSA-1474165 | Reproduction                                                                                              | 4.31E-13 | 4.07E-12 | 3.26E-12 | 13 |
| ReactomePA | R-HSA-212165  | Epigenetic regulation of gene expression                                                                  | 5.16E-13 | 4.74E-12 | 3.80E-12 | 13 |
| ReactomePA | R-HSA-8878171 | Transcriptional regulation by RUNX1                                                                       | 1.02E-12 | 9.20E-12 | 7.37E-12 | 15 |
| ReactomePA | R-HSA-73886   | Chromosome Maintenance                                                                                    | 9.94E-12 | 8.71E-11 | 6.98E-11 | 11 |
| ReactomePA | R-HSA-201681  | TCF dependent signaling in response to WNT                                                                | 1.19E-11 | 1.02E-10 | 8.16E-11 | 14 |
| ReactomePA | R-HSA-5693571 | Nonhomologous End-Joining (NHEJ)                                                                          | 7.82E-11 | 6.55E-10 | 5.25E-10 | 9  |
| ReactomePA | R-HSA-5689880 | Ub-specific processing proteases                                                                          | 8.85E-11 | 7.25E-10 | 5.81E-10 | 13 |
| ReactomePA | R-HSA-195721  | Signaling by WNT                                                                                          | 1.04E-10 | 8.38E-10 | 6.72E-10 | 15 |
| ReactomePA | R-HSA-5693565 | Recruitment and ATM-mediated phosphorylation of repair and signaling proteins at DNA double strand breaks | 1.91E-10 | 1.50E-09 | 1.20E-09 | 9  |

|            |               |                                                                            |          |          |          |    |
|------------|---------------|----------------------------------------------------------------------------|----------|----------|----------|----|
| ReactomePA | R-HSA-5693606 | DNA Double Strand Break Response                                           | 2.16E-10 | 1.66E-09 | 1.33E-09 | 9  |
| ReactomePA | R-HSA-2262752 | Cellular responses to stress                                               | 4.15E-10 | 3.13E-09 | 2.51E-09 | 16 |
| ReactomePA | R-HSA-69473   | G2/M DNA damage checkpoint                                                 | 1.46E-09 | 1.08E-08 | 8.65E-09 | 9  |
| ReactomePA | R-HSA-5693607 | Processing of DNA double-strand break ends                                 | 1.93E-09 | 1.40E-08 | 1.12E-08 | 9  |
| ReactomePA | R-HSA-5688426 | Deubiquitination                                                           | 3.57E-09 | 2.54E-08 | 2.04E-08 | 13 |
| ReactomePA | R-HSA-3214858 | RMTs methylate histone arginines                                           | 7.52E-09 | 5.25E-08 | 4.21E-08 | 8  |
| ReactomePA | R-HSA-195258  | RHO GTPase Effectors                                                       | 8.14E-09 | 5.58E-08 | 4.47E-08 | 13 |
| ReactomePA | R-HSA-68886   | M Phase                                                                    | 1.22E-08 | 8.23E-08 | 6.59E-08 | 14 |
| ReactomePA | R-HSA-69481   | G2/M Checkpoints                                                           | 1.57E-08 | 1.04E-07 | 8.32E-08 | 10 |
| ReactomePA | R-HSA-5693567 | HDR through Homologous Recombination (HR) or Single Strand Annealing (SSA) | 2.71E-08 | 1.76E-07 | 1.41E-07 | 9  |
| ReactomePA | R-HSA-5693538 | Homology Directed Repair                                                   | 4.00E-08 | 2.55E-07 | 2.05E-07 | 9  |
| ReactomePA | R-HSA-5693532 | DNA Double-Strand Break Repair                                             | 1.97E-07 | 1.24E-06 | 9.92E-07 | 9  |
| ReactomePA | R-HSA-194315  | Signaling by Rho GTPases                                                   | 4.31E-07 | 2.67E-06 | 2.14E-06 | 13 |
| ReactomePA | R-HSA-8866654 | E3 ubiquitin ligases ubiquitinate target proteins                          | 5.11E-07 | 3.11E-06 | 2.49E-06 | 6  |
| ReactomePA | R-HSA-69620   | Cell Cycle Checkpoints                                                     | 2.78E-06 | 1.66E-05 | 1.33E-05 | 10 |
| ReactomePA | R-HSA-8852135 | Protein ubiquitination                                                     | 3.08E-06 | 1.81E-05 | 1.45E-05 | 6  |
| ReactomePA | R-HSA-3214842 | HDMs demethylate histones                                                  | 6.97E-06 | 4.04E-05 | 3.24E-05 | 5  |
| ReactomePA | R-HSA-73894   | DNA Repair                                                                 | 3.90E-05 | 2.23E-04 | 1.79E-04 | 9  |
| ReactomePA | R-HSA-5689901 | Metalloprotease DUBs                                                       | 4.18E-05 | 2.35E-04 | 1.89E-04 | 4  |
| ReactomePA | R-HSA-5689603 | UCH proteinases                                                            | 2.01E-04 | 1.11E-03 | 8.93E-04 | 5  |
| ReactomePA | R-HSA-3214841 | PKMTs methylate histone lysines                                            | 5.38E-04 | 2.94E-03 | 2.36E-03 | 4  |

BP: biological process; CC: cellular component; MF: molecular function
